# Supplementary material for: Sulfate differentially stimulates but is not respired by diverse anaerobic methanotrophic archaea
Source: Springer Nature journal article supplement (doi:10.1038/s41396-021-01047-0), 2021-07-20
Supplement: MOESM2 [file 41396_2021_1047_MOESM2_ESM.xlsx]

## Sheet: iTag_analysis
Taxon	7142A	7142B	7142C
Archaea;__Euryarchaeota;__Methanomicrobia;__Methanosarcinales;__ANME-2a-2b;__g	0.0752229	0.0626068	0.0610223
Bacteria;__Proteobacteria;__Deltaproteobacteria;__Desulfobacterales;__Desulfobacteraceae;__SEEP-SRB1	0.148657	0.128665	0.150641
Archaea;__Euryarchaeota;__Methanomicrobia;__Methanosarcinales;__ANME-2c;__g	0.0600342	0.060283	0.0525558
Unassigned;Other;Other;Other;Other;Other	0.0811222	0.0841706	0.0880028
Bacteria;__Planctomycetes;__Phycisphaerae;__MSBL9;__f;__g	0.0576584	0.0669469	0.074899
Bacteria;__Candidate_division_JS1;__c;__o;__f;__g	0.0163366	0.0181122	0.0152819
Archaea;__Euryarchaeota;__Methanomicrobia;__Methanosarcinales;__ANME-2a-2b;__ANME-2b	0.00894239	0.00328071	0.0033023
Bacteria;__Deferribacteres;__Deferribacteres;__Deferribacterales;__Family_Incertae_Sedis;__Caldithrix	0.0129198	0.0142847	0.0140875
Bacteria;__Candidate_division_WS3;__c;__o;__f;__g	0.0176712	0.019445	0.0235025
Bacteria;__Firmicutes;__Clostridia;__Clostridiales;__Family_XII_Incertae_Sedis;__Fusibacter	0.00245582	0.00519445	0.00158089
Archaea;__Thaumarchaeota;__Marine_Benthic_Group_B;__o;__f;__g	0.0121723	0.0146607	0.00976638
Archaea;__Euryarchaeota;__Thermoplasmata;__Thermoplasmatales;__Marine_Benthic_Group_D_and_DHVEG-1;__g	0.0150019	0.0220422	0.0192166
Bacteria;__Chloroflexi;__Anaerolineae;__Anaerolineales;__Anaerolineaceae;__uncultured	0.088463	0.0949354	0.0862814
Bacteria;__Spirochaetae;__Spirochaetes;__Spirochaetales;__Spirochaetaceae;__Spirochaeta	0.0129198	0.0131912	0.0115581
Bacteria;__Candidate_division_OP8;__c;__o;__f;__g	0.0104639	0.0121318	0.0132443
Bacteria;__TA06;__c;__o;__f;__g	0.00704714	0.00861185	0.00997716
Bacteria;__Proteobacteria;__Deltaproteobacteria;__Desulfobacterales;__Desulfobulbaceae;__Desulfobulbus	0.0101703	0.0121659	0.0112419
Bacteria;__Proteobacteria;__Deltaproteobacteria;__Desulfobacterales;__Desulfobacteraceae;Other	0.00864876	0.0100813	0.0156684
Archaea;__Euryarchaeota;__Methanomicrobia;__Methanosarcinales;__Methanosarcinaceae;__ANME-3	0.0025359	0.00310984	0.00224838
Bacteria;__Chloroflexi;__Dehalococcoidia;Other;Other;Other	0.00864876	0.00751828	0.0125417
Bacteria;__Proteobacteria;__Deltaproteobacteria;__Desulfarculales;__Desulfarculaceae;__uncultured	0.0115584	0.0117559	0.0142631
Bacteria;__Firmicutes;__Bacilli;__Bacillales;__Bacillaceae;__Bacillus	0	0.000205044	0.000175654
Bacteria;__Proteobacteria;__Deltaproteobacteria;__Desulfobacterales;__Desulfobacteraceae;__Desulfococcus	0.0110512	0.0052628	0.00699104
Archaea;__Thaumarchaeota;__Group_C3;__o;__f;__g	0.0076344	0.00871437	0.00850167
Bacteria;__Proteobacteria;__Gammaproteobacteria;__Enterobacteriales;__Enterobacteriaceae;Other	8.00811e-05	0.000102522	0
Bacteria;__Proteobacteria;__Gammaproteobacteria;__Xanthomonadales;__Xanthomonadaceae;__Stenotrophomonas	2.66937e-05	3.4174e-05	0
Bacteria;__Proteobacteria;__Deltaproteobacteria;__Desulfobacterales;__Desulfobacteraceae;__uncultured	0.0055256	0.00533115	0.00667486
Bacteria;__Planctomycetes;__Phycisphaerae;__Phycisphaerales;Other;Other	0.0134269	0.0143189	0.0139821
Bacteria;__Bacteroidetes;__BD2-2;__o;__f;__g	0.00982329	0.0100813	0.00822062
Bacteria;__Proteobacteria;__Deltaproteobacteria;__Desulfobacterales;__Desulfobulbaceae;__SEEP-SRB2	0.00525866	0.00416923	0.00526963
Bacteria;__Proteobacteria;__Deltaproteobacteria;__Desulfobacterales;__Desulfobacteraceae;__Sva0081_sediment_group	0.00429769	0.00492106	0.00699104
Archaea;__Euryarchaeota;__Halobacteria;__Halobacteriales;__Marine_Hydrothermal_Vent_Group(MHVG);__g	0.00742085	0.00731324	0.00414544
Bacteria;__Acidobacteria;__Holophagae;__Subgroup_23;__NKB17;__g	0.00629972	0.0059121	0.00818549
Bacteria;__Chloroflexi;__Dehalococcoidia;__MSBL5;__f;__g	0.00499172	0.00502358	0.00576146
Archaea;__Euryarchaeota;__Methanomicrobia;__ANME-1;__ANME-1a;__g	0.00448454	0.00290479	0.00302125
Bacteria;__Hyd24-12;__c;__o;__f;__g	0.00387059	0.0035541	0.00337256
Bacteria;__Planctomycetes;__Phycisphaerae;Other;Other;Other	0.0115317	0.0118242	0.0106095
Bacteria;__Firmicutes;__Clostridia;__Clostridiales;__Lachnospiraceae;__Incertae_Sedis	0	0	0
Bacteria;__Proteobacteria;__Deltaproteobacteria;__Desulfobacterales;__Desulfobacteraceae;__Desulfobacula	0.023357	0.0134304	0.00727209
Archaea;__Euryarchaeota;__Methanomicrobia;__Methanosarcinales;__Methanosarcinaceae;Other	0.0012546	0.00112774	0.00179167
Bacteria;__Firmicutes;__Bacilli;__Lactobacillales;__Enterococcaceae;__Enterococcus	0	0	0
Bacteria;__Firmicutes;__Bacilli;__Lactobacillales;__Lactobacillaceae;__Lactobacillus	0	0	0
Bacteria;__Bacteroidetes;Other;Other;Other;Other	0.00597939	0.00451097	0.00302125
Archaea;__Thaumarchaeota;__Miscellaneous_Crenarchaeotic_Group;__o;__f;__g	0.00282953	0.00348575	0.00224838
Bacteria;__Chlorobi;__Ignavibacteria;__Ignavibacteriales;__PHOS-HE36;__g	0.00304308	0.00348575	0.00379413
Bacteria;__Proteobacteria;__Gammaproteobacteria;__Chromatiales;__Ectothiorhodospiraceae;__Acidiferrobacter	0.00181517	0.00259723	0.00266995
Bacteria;__Proteobacteria;__Gammaproteobacteria;Other;Other;Other	0.00112114	0.00116192	0.00207272
Bacteria;__Chloroflexi;Other;Other;Other;Other	0.0080615	0.00734741	0.00955559
Bacteria;__Spirochaetae;__Spirochaetes;__Kazan-3B-09;__f;__g	0.00376381	0.00481854	0.00502371
Bacteria;__Bacteroidetes;__Sphingobacteriia;__Sphingobacteriales;__WCHB1-69;__g	0.0029897	0.00239218	0.00231864
Bacteria;__Proteobacteria;__Deltaproteobacteria;__DTB120;__f;__g	0.00136138	0.00136696	0.00172141
Bacteria;__Actinobacteria;__OPB41;__o;__f;__g	0.0012546	0.00119609	0.00140523
Bacteria;__Armatimonadetes;__c;__o;__f;__g	0.00245582	0.00256305	0.00270508
Bacteria;__Planctomycetes;__Phycisphaerae;__SHA-43;__f;__g	0.002963	0.00307566	0.00295099
Bacteria;__Chloroflexi;__Dehalococcoidia;__GIF9;__f;__g	0.000507181	0.000410088	0.00042157
Bacteria;__Proteobacteria;__Gammaproteobacteria;__Xanthomonadales;__JTB255_marine_benthic_group;__g	0.000987668	0.00105939	0.00168628
Bacteria;__Bacteroidetes;__Bacteroidia;__Bacteroidales;__Marinilabiaceae;__uncultured	0.00485826	0.0026314	0.00161602
Bacteria;__Thermotogae;__Thermotogae;__Thermotogales;__Thermotogaceae;Other	0	0	0
Bacteria;__Acidobacteria;__Subgroup_22;__o;__f;__g	0.00162832	0.00256305	0.00316178
Bacteria;__Candidate_division_OP3;__c;__o;__f;__g	0.0025359	0.00174287	0.00144037
Bacteria;__Proteobacteria;__Deltaproteobacteria;__Sh765B-TzT-29;__f;__g	0.00331002	0.00399836	0.0046724
Bacteria;__Planctomycetes;__Phycisphaerae;__Phycisphaerales;__ODP1230B30.02_sediment_group;__g	0.00282953	0.00317818	0.00259968
Bacteria;__Bacteroidetes;__Bacteroidia;__Bacteroidales;__Bacteroidaceae;__Bacteroides	2.66937e-05	0	0
Bacteria;__Proteobacteria;__Deltaproteobacteria;__Desulfobacterales;__Nitrospinaceae;__uncultured	0.00202872	0.00198209	0.00274021
Bacteria;__Bacteroidetes;__Flavobacteria;__Flavobacteriales;__Flavobacteriaceae;__uncultured	0.00248252	0.00259723	0.00140523
Archaea;__Euryarchaeota;__Methanomicrobia;__Methanosarcinales;__Methanosarcinaceae;__Methanosarcina	0	0	0
Bacteria;__Planctomycetes;__vadinHA49;__o;__f;__g	0.00464471	0.00478436	0.00389953
Bacteria;Other;Other;Other;Other;Other	0.00120122	0.00123026	0.0019322
Bacteria;__Chloroflexi;__Caldilineae;__Caldilineales;__Caldilineaceae;__uncultured	0.00491164	0.00406671	0.0042157
Bacteria;__Planctomycetes;__Pla4_lineage;__o;__f;__g	0.00592601	0.00550202	0.00354822
Archaea;__Ancient_Archaeal_Group(AAG);__c;__o;__f;__g	0.00224227	0.00297314	0.0018268
Bacteria;__Proteobacteria;__Deltaproteobacteria;__Sva0485;__f;__g	0.00146815	0.0018454	0.00221324
Bacteria;__Planctomycetes;__Phycisphaerae;__Phycisphaerales;__08D2Z94_hypersaline_microbial_mat_group;__g	0.0038439	0.00505775	0.00425083
Bacteria;__Planctomycetes;__Planctomycetacia;__Planctomycetales;__Planctomycetaceae;__Pir4_lineage	0.00157493	0.00205044	0.00115932
Bacteria;__Candidate_division_BRC1;__c;__o;__f;__g	0.00347018	0.00358827	0.00414544
Bacteria;__Proteobacteria;__Gammaproteobacteria;__Enterobacteriales;__Enterobacteriaceae;__Escherichia-Shigella	0	0	0
Archaea;__Euryarchaeota;__Methanomicrobia;__Methanosarcinales;__ANME-2a-2b;Other	0.000266937	0.000102522	0.000245916
Bacteria;__Chloroflexi;__Dehalococcoidia;__GIF3;__f;__g	0.000987668	0.00119609	0.00168628
Bacteria;__Planctomycetes;__Planctomycetacia;__Planctomycetales;__Planctomycetaceae;__uncultured	0.00216219	0.00218714	0.00235377
Bacteria;__Bacteroidetes;__Flavobacteria;__Flavobacteriales;__Flavobacteriaceae;Other	0.0012813	0.00174287	0.000526963
Bacteria;__Proteobacteria;__Deltaproteobacteria;__Myxococcales;__Sandaracinaceae;__g	0.00285623	0.00283644	0.0023889
Bacteria;__Actinobacteria;__Acidimicrobiia;__Acidimicrobiales;__OCS155_marine_group;__g	0.00176179	0.00167453	0.00126471
Archaea;__Euryarchaeota;__Halobacteria;__Halobacteriales;__Deep_Sea_Hydrothermal_Vent_Gp_6(DHVEG-6);__Candidatus_Parvarchaeum	0.00138807	0.00164035	0.00126471
Bacteria;__Deferribacteres;__Deferribacteres;__Deferribacterales;__SAR406_clade(Marine_group_A);__g	0.00112114	0.00150366	0.000562094
Bacteria;__Firmicutes;__Clostridia;__Clostridiales;Other;Other	0.000667343	0.000751828	0.000526963
Bacteria;__Proteobacteria;__Deltaproteobacteria;__SAR324_clade(Marine_group_B);__f;__g	0.00138807	0.00164035	0.00151063
Bacteria;__Proteobacteria;__Gammaproteobacteria;__Order_Incertae_Sedis;__Family_Incertae_Sedis;__Marinicella	0.000800811	0.00112774	0.00105393
Bacteria;__Deferribacteres;__Deferribacteres;__Deferribacterales;__LCP-89;__g	0.00181517	0.00143531	0.00224838
Bacteria;__Planctomycetes;__Phycisphaerae;__mle1-8;__f;__g	0.00261598	0.00369079	0.00418057
Bacteria;__Chloroflexi;__Dehalococcoidia;__vadinBA26;__f;__g	0.00117452	0.00105939	0.00080801
Bacteria;__Proteobacteria;__Gammaproteobacteria;__Pseudomonadales;__Pseudomonadaceae;__Pseudomonas	0.000133469	6.8348e-05	0
Bacteria;__Proteobacteria;__Deltaproteobacteria;__Desulfobacterales;__Desulfobulbaceae;__SEEP-SRB4	0.00184187	0.00187957	0.0019322
Bacteria;__Planctomycetes;__Phycisphaerae;__MSB-3A7_sediment_group;__f;__g	0.000587262	0.000786002	0.000632356
Bacteria;__Planctomycetes;__Phycisphaerae;__CCM11a;__f;__g	0.00557899	0.00707402	0.00498858
Bacteria;__Lentisphaerae;__Lentisphaeria;__R76-B128;__f;__g	0.00165501	0.0024947	0.000843141
Bacteria;__Planctomycetes;__MBMPE71;__o;__f;__g	0.0042443	0.00410088	0.00449675
Archaea;__Euryarchaeota;__Halobacteria;__Halobacteriales;__Deep_Sea_Euryarchaeotic_Group(DSEG);__g	0.000400406	0.000136696	0.000210785
Bacteria;__Proteobacteria;__Deltaproteobacteria;Other;Other;Other	0.00208211	0.00215296	0.00460214
Archaea;__Euryarchaeota;__Thermoplasmata;__Thermoplasmatales;__CCA47;__g	0.00274945	0.00464767	0.00354822
Bacteria;__Fibrobacteres;__Fibrobacteria;__possible_order_07;__f;__g	0.000694037	0.00146948	0.00105393
Bacteria;__Chloroflexi;__Dehalococcoidia;__Napoli-4B-65;__f;__g	0.000533874	0.000375914	0.000737748
Bacteria;__Bacteroidetes;__Bacteroidia;__Bacteroidales;__Porphyromonadaceae;__Dysgonomonas	0	0	0
Archaea;__Euryarchaeota;__Methanomicrobia;__Methanosarcinales;__Methanosarcinaceae;__Methanolobus	0	0	0
Bacteria;__TM6;__c;__o;__f;__g	0.00093428	0.000956872	0.00126471
Bacteria;__Planctomycetes;__Planctomycetacia;__Planctomycetales;__Planctomycetaceae;Other	0.00216219	0.00252888	0.00217811
Bacteria;__Planctomycetes;__OM190;__o;__f;__g	0.00072073	0.00085435	0.000737748
Bacteria;__Gemmatimonadetes;__Gemmatimonadetes;__BD2-11_terrestrial_group;__f;__g	0.00146815	0.000888524	0.00115932
Bacteria;__Proteobacteria;__Deltaproteobacteria;__Desulfobacterales;__Desulfobulbaceae;__Desulfocapsa	0.000293631	0.000410088	0.000562094
Bacteria;__Bacteroidetes;__Cytophagia;__Cytophagales;__Flammeovirgaceae;__Reichenbachiella	0.000240243	0.000102522	0.000316178
Bacteria;__Chloroflexi;__Anaerolineae;__Anaerolineales;__Anaerolineaceae;Other	0.00304308	0.00314401	0.00295099
Bacteria;__Firmicutes;__Clostridia;__Clostridiales;__Family_XI_Incertae_Sedis;Other	0	0	0
Bacteria;__Nitrospirae;__Nitrospira;__Nitrospirales;__Nitrospiraceae;__uncultured	0.000640649	0.00133279	0.000913402
Bacteria;__Gemmatimonadetes;__Gemmatimonadetes;__PAUC43f_marine_benthic_group;__f;__g	0.000827505	0.000888524	0.00080801
Bacteria;__Spirochaetae;__Spirochaetes;__Spirochaetales;__Spirochaetaceae;__uncultured	0.000587262	0.000375914	0.000456701
Bacteria;__Chloroflexi;__S085;__o;__f;__g	0.000293631	0.00034174	0.000843141
Bacteria;__Proteobacteria;__Deltaproteobacteria;__Desulfuromonadales;__Desulfuromonadaceae;__Pelobacter	0.000987668	0.00164035	0.00115932
Bacteria;__Proteobacteria;__Gammaproteobacteria;__Order_Incertae_Sedis;__Family_Incertae_Sedis;__Sedimenticola	0.000320325	0.00034174	0.000456701
Archaea;__Euryarchaeota;__Methanomicrobia;__Methanosarcinales;Other;Other	0.000240243	0.000410088	0.000562094
Bacteria;__Acidobacteria;__Acidobacteria;__Subgroup_9;__f;__g	0.000266937	0.000410088	0.000245916
Bacteria;__Planctomycetes;__Phycisphaerae;__Pla1_lineage;__f;__g	0.00205542	0.00228966	0.00168628
Bacteria;__Proteobacteria;__Deltaproteobacteria;__Syntrophobacterales;__Syntrophobacteraceae;__uncultured	0.000266937	0.000478436	0.000491832
Bacteria;__Proteobacteria;__Deltaproteobacteria;__Desulfobacterales;__Desulfobulbaceae;__uncultured	0.000373712	0.000375914	0.000737748
Bacteria;__Proteobacteria;__Deltaproteobacteria;__Desulfobacterales;__Desulfobacteraceae;__Desulfosalsimonas	0.000400406	0.000580958	0.000491832
Bacteria;__Gemmatimonadetes;__Gemmatimonadetes;__Gemmatimonadales;__Gemmatimonadaceae;__uncultured	0.000667343	0.000478436	0.00105393
Bacteria;__Acidobacteria;__Acidobacteria;__Subgroup_3;Other;Other	0.000613955	0.000444262	0.000316178
Archaea;__Euryarchaeota;__Halobacteria;__Halobacteriales;__Deep_Sea_Hydrothermal_Vent_Gp_6(DHVEG-6);__g	0.00101436	0.00105939	0.000983664
Bacteria;__Acidobacteria;__Acidobacteria;__Subgroup_17;__f;__g	0.000880893	0.00129861	0.000843141
Bacteria;__GOUTA4;__c;__o;__f;__g	0.000667343	0.000375914	0.000772879
Bacteria;__Proteobacteria;__Deltaproteobacteria;__Desulfobacterales;Other;Other	0.000453793	0.000546784	0.000913402
Bacteria;__Chloroflexi;__Dehalococcoidia;__FW22;__f;__g	0.000347018	0.000820176	0.000983664
Bacteria;__Firmicutes;__Clostridia;__Clostridiales;__vadinBB60;__g	8.00811e-05	3.4174e-05	0.000105393
Bacteria;__Acidobacteria;__Acidobacteria;__Subgroup_21;__f;__g	0.00149485	0.00194792	0.00151063
Bacteria;__Proteobacteria;__Epsilonproteobacteria;__Campylobacterales;__Helicobacteraceae;__Sulfurimonas	0.00480487	0.00478436	0.0023889
Bacteria;__Proteobacteria;__Alphaproteobacteria;__Rhizobiales;__Rhodobiaceae;__Rhodobium	0.000240243	0.00017087	0.000140523
Archaea;__Euryarchaeota;__Methanomicrobia;__Methanosarcinales;__Methanosarcinaceae;__Methanococcoides	0.000320325	0.000102522	7.02617e-05
Archaea;__Euryarchaeota;__Methanomicrobia;__ANME-1;__ANME-1b;__g	0.000106775	0.000102522	0
Bacteria;__Planctomycetes;__Pla3_lineage;__o;__f;__g	0.000880893	0.00102522	0.000843141
Bacteria;__Proteobacteria;__Deltaproteobacteria;__Desulfuromonadales;__Desulfuromonadaceae;Other	0.000133469	0.000273392	0.000245916
Bacteria;__Proteobacteria;__Betaproteobacteria;__Burkholderiales;__Alcaligenaceae;__Paenalcaligenes	0	0	0
Bacteria;__Acidobacteria;__Holophagae;__Subgroup_10;__Sva0725;__g	0.000106775	0.000136696	0.000210785
Bacteria;__Firmicutes;__Clostridia;__Clostridiales;__Clostridiaceae;__Clostridium	0.000266937	0.000307566	0
Bacteria;__Proteobacteria;__Gammaproteobacteria;__Enterobacteriales;__Enterobacteriaceae;__Cronobacter	0	0	0
Bacteria;__Bacteroidetes;__Sphingobacteriia;__Sphingobacteriales;Other;Other	0.000774118	0.000546784	0.000702617
Bacteria;__Acidobacteria;__Acidobacteria;Other;Other;Other	5.33874e-05	0	0
Bacteria;__Fusobacteria;__Fusobacteriia;__Fusobacteriales;__Fusobacteriaceae;__Psychrilyobacter	0.000293631	0.000239218	0.000351309
Bacteria;__Firmicutes;__Clostridia;__Clostridiales;__Syntrophomonadaceae;__Dethiobacter	0	0	0
Bacteria;__Firmicutes;__Clostridia;__Clostridiales;__Clostridiaceae;__Alkaliphilus	0	0	0
Bacteria;__Planctomycetes;__Phycisphaerae;__Phycisphaerales;__Phycisphaeraceae;__Urania-1B-19_marine_sediment_group	0.00277615	0.00307566	0.00179167
Bacteria;__Proteobacteria;__Alphaproteobacteria;__Rhodobacterales;__Rhodobacteraceae;Other	0.000266937	0.000239218	0.000526963
Archaea;__Thaumarchaeota;__Marine_Group_I;__o;__f;__g	0.000320325	0.000205044	0.000175654
Bacteria;__Actinobacteria;__Thermoleophilia;__Gaiellales;__uncultured;__g	2.66937e-05	0.000136696	0.000281047
Bacteria;__Elusimicrobia;__Elusimicrobia;__o;__f;__g	0.000373712	0.000136696	0
Bacteria;__Proteobacteria;Other;Other;Other;Other	0.000373712	0.000205044	0.000702617
Bacteria;__RF3;__c;__o;__f;__g	0.000507181	0.000444262	0.000526963
Bacteria;__Proteobacteria;__Deltaproteobacteria;__Syntrophobacterales;__Syntrophaceae;Other	0.000240243	0.000307566	0.00042157
Bacteria;__Lentisphaerae;__Lentisphaeria;__MSBL3;__f;__g	0.000160162	0	7.02617e-05
Bacteria;__Proteobacteria;__Deltaproteobacteria;__Desulfobacterales;__Desulfobulbaceae;Other	0.000240243	0.00034174	0.000526963
Bacteria;__Fibrobacteres;__Fibrobacteria;__Fibrobacterales;Other;Other	0.000106775	0.00017087	0.000562094
Bacteria;__Proteobacteria;__Deltaproteobacteria;__Bdellovibrionales;__Bdellovibrionaceae;__Bdellovibrio	0.000133469	6.8348e-05	0
Bacteria;__Proteobacteria;__Gammaproteobacteria;__Enterobacteriales;__Enterobacteriaceae;__Citrobacter	0	0	0
Bacteria;__Firmicutes;__Clostridia;__Clostridiales;__Family_XI_Incertae_Sedis;__Sedimentibacter	0	0	0
Bacteria;__Firmicutes;__Clostridia;__Clostridiales;__Ruminococcaceae;Other	0.000587262	0.000615132	0.000316178
Archaea;__Euryarchaeota;__Halobacteria;__Halobacteriales;__Miscellaneous_Euryarchaeotic_Group(MEG);__g	0.00160162	0.00191374	0.00105393
Bacteria;__LD1-PA38;__c;__o;__f;__g	0.000240243	0.000444262	0.000210785
Bacteria;__Deinococcus-Thermus;__Deinococci;__KD3-62;__f;__g	0.000640649	0.000820176	0.000526963
Bacteria;__Cyanobacteria;__Cyanobacteria;__SubsectionI;__FamilyI;__Synechococcus	0.000133469	0.000102522	0.000210785
Bacteria;__NPL-UPA2;__c;__o;__f;__g	0.000667343	0.000717654	0.000702617
Bacteria;__Proteobacteria;__Gammaproteobacteria;__Thiotrichales;__Thiotrichaceae;__uncultured	0.00104105	0.00153783	0.00122958
Bacteria;__Cyanobacteria;__SHA-109;__o;__f;__g	0.000427099	0.000273392	0.000105393
Bacteria;__Planctomycetes;__Phycisphaerae;__Phycisphaerales;__AKAU3564_sediment_group;__g	0.000186856	0.00034174	0.000386439
Archaea;__Euryarchaeota;__Methanomicrobia;__ANME-1;Other;Other	2.66937e-05	3.4174e-05	7.02617e-05
Bacteria;__Firmicutes;__Clostridia;__Clostridiales;__Peptococcaceae;__Desulfosporosinus	0	0	0
Bacteria;__JL-ETNP-Z39;__c;__o;__f;__g	0.000320325	0.000478436	0.000351309
Archaea;__Euryarchaeota;__Thermoplasmata;__Thermoplasmatales;__20c-4;__g	0.000106775	0.000136696	0.000105393
Bacteria;__Chlorobi;__Chlorobia;__Chlorobiales;__OPB56;__g	0.000347018	0.000136696	0.000140523
Bacteria;__Chloroflexi;__Dehalococcoidia;__FS117-23B-02;__f;__g	0	0	0.000105393
Archaea;__Euryarchaeota;__Methanomicrobia;__Methanosarcinales;__Methanosarcinaceae;__Methanohalophilus	2.66937e-05	3.4174e-05	0
Archaea;__Euryarchaeota;__Thermoplasmata;__Thermoplasmatales;__ANT06-05;__g	0.000373712	0.000580958	0.000210785
Bacteria;__Planctomycetes;__Phycisphaerae;__Phycisphaerales;__SBYZ-984;__g	0.000320325	0.000307566	0.000632356
Bacteria;__Proteobacteria;__Deltaproteobacteria;__Desulfobacterales;__Desulfobulbaceae;__MSBL7	5.33874e-05	3.4174e-05	0
Bacteria;__Proteobacteria;__Gammaproteobacteria;__Legionellales;__Coxiellaceae;__Aquicella	2.66937e-05	0.000102522	0
Bacteria;__Lentisphaerae;__Lentisphaeria;Other;Other;Other	0.000880893	0.000888524	0.00119445
Bacteria;__Bacteroidetes;__VC2.1_Bac22;__o;__f;__g	0.000427099	0.000273392	0
Archaea;__Euryarchaeota;__Thermoplasmata;__Thermoplasmatales;__VC2.1_Arc6;__g	0.00157493	0.00191374	0.000737748
Archaea;__p;__c;__o;__f;__g	0.000266937	0.00017087	0.000105393
Bacteria;__Acidobacteria;__Holophagae;Other;Other;Other	0	0	0
Bacteria;__Bacteroidetes;__SB-1;__o;__f;__g	0.00178848	0.00140113	0.000878272
Bacteria;__Chlamydiae;__Chlamydiae;__Chlamydiales;__Simkaniaceae;__Candidatus_Rhabdochlamydia	0	0	0
Bacteria;__Planctomycetes;__Phycisphaerae;__B103G10;__f;__g	5.33874e-05	0.000136696	0
Bacteria;__Firmicutes;__Clostridia;__Clostridiales;__Family_XI_Incertae_Sedis;__uncultured	0	0	0
Bacteria;__Firmicutes;__Clostridia;__Clostridiales;__Clostridiaceae;__Caminicella	0	0	0
Bacteria;__Firmicutes;__Clostridia;__Clostridiales;__Caldicoprobacteraceae;__Caldicoprobacter	0	0	0
Bacteria;__Firmicutes;__Clostridia;__Clostridiales;__Syntrophomonadaceae;__uncultured	0	0	0
Bacteria;__Proteobacteria;__Epsilonproteobacteria;__Campylobacterales;__Helicobacteraceae;__Sulfurovum	0.00165501	0.00126444	0.0010188
Bacteria;__Planctomycetes;__Planctomycetacia;__Planctomycetales;__Planctomycetaceae;__Blastopirellula	0.000320325	0.000375914	0.000245916
Bacteria;__Nitrospirae;__Nitrospira;__Nitrospirales;__40296;__g	0.00101436	0.000615132	0.000526963
Bacteria;__Proteobacteria;__Gammaproteobacteria;__Alteromonadales;__Alteromonadaceae;Other	0.000694037	0.000580958	0.0010188
Bacteria;__Firmicutes;__Clostridia;__Clostridiales;__Christensenellaceae;__uncultured	0.000106775	0.00017087	0
Bacteria;__Proteobacteria;__Alphaproteobacteria;__Rhizobiales;__Hyphomicrobiaceae;__uncultured	0.00021355	3.4174e-05	7.02617e-05
Bacteria;__Proteobacteria;__Alphaproteobacteria;__Rhodospirillales;__Rhodospirillaceae;__uncultured	0	0	0
Bacteria;__Proteobacteria;__Alphaproteobacteria;__Rhizobiales;__Hyphomicrobiaceae;Other	5.33874e-05	0.000136696	0.000210785
Bacteria;__Acidobacteria;__Subgroup_26;__o;__f;__g	8.00811e-05	3.4174e-05	0.000175654
Bacteria;__Planctomycetes;__Phycisphaerae;__Phycisphaerales;__Phycisphaeraceae;Other	0.000293631	0.000410088	0.000351309
Bacteria;__Acidobacteria;__Acidobacteria;__Subgroup_25;__f;__g	0.00021355	0.000307566	0.000351309
Bacteria;__Lentisphaerae;__Lentisphaeria;__Victivallales;__Victivallaceae;__uncultured	0.00093428	0.000786002	0.00080801
Bacteria;__Planctomycetes;__Phycisphaerae;__Phycisphaerales;__Phycisphaeraceae;__Phycisphaera	0.000186856	0.000375914	0.000105393
Bacteria;__Elusimicrobia;__Elusimicrobia;__Lineage_IV;__f;__g	0.000427099	0.000136696	0.000210785
Bacteria;__Acidobacteria;__Holophagae;__Acanthopleuribacterales;__Acanthopleuribacteraceae;__Acanthopleuribacter	5.33874e-05	0.000102522	0.000140523
Bacteria;__Proteobacteria;__Gammaproteobacteria;__Enterobacteriales;__Enterobacteriaceae;__Proteus	0	0	0
Bacteria;__BHI80-139;__c;__o;__f;__g	0.000240243	0.000375914	0.000456701
Bacteria;__Candidate_division_OP11;__c;__o;__f;__g	8.00811e-05	0	0.000175654
Archaea;__Euryarchaeota;__Thermoplasmata;__Thermoplasmatales;__MKCST-A3;__g	8.00811e-05	0.000273392	3.51309e-05
Bacteria;__Bacteroidetes;__Bacteroidia;__Bacteroidales;__Rikenellaceae;__Blvii28_wastewater-sludge_group	0	0	0
Bacteria;__Proteobacteria;__Alphaproteobacteria;__Rhizobiales;__Hyphomicrobiaceae;__Filomicrobium	2.66937e-05	3.4174e-05	0
Bacteria;__Verrucomicrobia;__Verrucomicrobiae;__Verrucomicrobiales;__Verrucomicrobiaceae;__Persicirhabdus	2.66937e-05	3.4174e-05	3.51309e-05
Bacteria;__Cyanobacteria;__Chloroplast;__o;__f;__g	0.000186856	0.00017087	0.000105393
Bacteria;__Firmicutes;__Clostridia;__Thermoanaerobacterales;__Thermodesulfobiaceae;__Coprothermobacter	0	6.8348e-05	0
Archaea;__Euryarchaeota;__Thermoplasmata;__Thermoplasmatales;__AMOS1A-4113-D04;__g	0.00120122	0.000888524	0.000948533
Bacteria;__Chlorobi;__Ignavibacteria;__Ignavibacteriales;__BSV26;__g	0.000133469	0.000239218	7.02617e-05
Bacteria;__Proteobacteria;__Alphaproteobacteria;__Rhodospirillales;__Rhodospirillaceae;Other	5.33874e-05	0.000102522	7.02617e-05
Bacteria;__Bacteroidetes;__Flavobacteria;__Flavobacteriales;__Flavobacteriaceae;__Maritimimonas	0.000533874	0.00051261	0.000316178
Bacteria;__Proteobacteria;__Gammaproteobacteria;__BD7-8_marine_group;__f;__g	2.66937e-05	3.4174e-05	0.000175654
Archaea;__Euryarchaeota;__Methanomicrobia;Other;Other;Other	5.33874e-05	0	0
Bacteria;__Proteobacteria;__Gammaproteobacteria;__Enterobacteriales;__Enterobacteriaceae;__Serratia	0	0	0
Archaea;__Euryarchaeota;__Thermoplasmata;__Thermoplasmatales;Other;Other	0.000400406	0.000615132	0.000316178
Bacteria;__Firmicutes;__Bacilli;__Bacillales;__Planococcaceae;__Lysinibacillus	0	0	0
Bacteria;__Bacteroidetes;__Bacteroidia;__Bacteroidales;__Porphyromonadaceae;__Proteiniphilum	0	0	0
Bacteria;__Firmicutes;__Bacilli;__Lactobacillales;Other;Other	0	0	0
Bacteria;__Verrucomicrobia;__Verrucomicrobiae;__Verrucomicrobiales;Other;Other	0	0	3.51309e-05
Bacteria;__Proteobacteria;__Alphaproteobacteria;__Rickettsiales;__TK34;__g	0	0	7.02617e-05
Bacteria;__Proteobacteria;__Alphaproteobacteria;__DB1-14;__f;__g	8.00811e-05	0.000102522	0
Bacteria;__Proteobacteria;__Deltaproteobacteria;__Desulfovibrionales;__Desulfovibrionaceae;__Desulfovibrio	5.33874e-05	6.8348e-05	3.51309e-05
Bacteria;__Proteobacteria;__Deltaproteobacteria;__Myxococcales;__Nannocystaceae;Other	0	0	0
Bacteria;__Proteobacteria;__Gammaproteobacteria;__Methylococcales;__Marine_Methylotrophic_Group_1;__g	5.33874e-05	0	7.02617e-05
Bacteria;__Firmicutes;__Clostridia;__Clostridiales;__Clostridiaceae;__Proteiniclasticum	0	0	0
Bacteria;__Proteobacteria;__Alphaproteobacteria;__Rhizobiales;__Phyllobacteriaceae;Other	0	0.000102522	0.000105393
Bacteria;__Spirochaetae;__Spirochaetes;__Spirochaetales;__Leptospiraceae;__uncultured	0.000480487	0.000478436	0.000281047
Archaea;__Euryarchaeota;__Thermoplasmata;__Fe-A-9;__f;__g	0	3.4174e-05	0
Archaea;__Euryarchaeota;__Thermoplasmata;__Thermoplasmatales;__Thermoplasmataceae;__Thermoplasma	8.00811e-05	0	0
Bacteria;__Actinobacteria;__Actinobacteria;__Frankiales;__Geodermatophilaceae;__Geodermatophilus	8.00811e-05	0.00017087	0.000105393
Bacteria;__Chlorobi;__Ignavibacteria;__Ignavibacteriales;Other;Other	0.000400406	0.00034174	0.000316178
Bacteria;__Deferribacteres;__Deferribacteres;__Deferribacterales;__PAUC34f;__g	0.00109444	0.00133279	0.000878272
Bacteria;__Elusimicrobia;__Elusimicrobia;__Lineage_IIa;__f;__g	0	3.4174e-05	0
Bacteria;__Firmicutes;__Clostridia;__Clostridiales;__Gracilibacteraceae;__Lutispora	0	0	0
Bacteria;__Planctomycetes;__Phycisphaerae;__ML-A-10;__f;__g	0.000106775	3.4174e-05	0
Bacteria;__Planctomycetes;__Phycisphaerae;__WD2101_soil_group;__f;__g	0	0	0
Bacteria;__Proteobacteria;__Alphaproteobacteria;__Rhodospirillales;__Rhodospirillaceae;__Thalassospira	0	0	0
Bacteria;__Proteobacteria;__Alphaproteobacteria;__SB1-18;__f;__g	2.66937e-05	0	0.000105393
Bacteria;__Proteobacteria;__Gammaproteobacteria;__Chromatiales;Other;Other	5.33874e-05	0	7.02617e-05
Bacteria;__Firmicutes;__Clostridia;__Clostridiales;__Clostridiaceae;Other	0	0	0
Bacteria;__Firmicutes;__Clostridia;__Clostridiales;__Peptococcaceae;Other	0	0	0
Bacteria;__Firmicutes;__Clostridia;__Clostridiales;__Clostridiaceae;__uncultured	0	0	0
Bacteria;__Firmicutes;__Clostridia;__Clostridiales;__Family_XII_Incertae_Sedis;Other	0	0	7.02617e-05
Bacteria;__Planctomycetes;__Planctomycetacia;__Planctomycetales;__Planctomycetaceae;__Rhodopirellula	0.000507181	0.000273392	0.000316178
Bacteria;__Proteobacteria;__Gammaproteobacteria;__Oceanospirillales;__Alcanivoracaceae;__Kangiella	0.000747424	0.00051261	0.000597225
Bacteria;__Bacteroidetes;__SB-5;__o;__f;__g	0.000133469	0.00034174	0.000105393
Archaea;__Euryarchaeota;__Methanomicrobia;__Methanocellales;__BS-K-E9;__g	2.66937e-05	0.000102522	0
Bacteria;__Proteobacteria;__Betaproteobacteria;__Burkholderiales;__Alcaligenaceae;Other	0	0	0
Bacteria;__Firmicutes;__Clostridia;__Clostridiales;__Family_XIV_Incertae_Sedis;__Anaerobranca	0	0	0
Bacteria;__Proteobacteria;__Deltaproteobacteria;__Bdellovibrionales;__Bacteriovoracaceae;__uncultured	8.00811e-05	0.000239218	7.02617e-05
Bacteria;__Proteobacteria;__Alphaproteobacteria;Other;Other;Other	0.000240243	6.8348e-05	0
Bacteria;__Firmicutes;__Clostridia;__Clostridiales;__Lachnospiraceae;__uncultured	0.000293631	0	0
Bacteria;__Planctomycetes;__MD2896-B258;__o;__f;__g	0.00072073	0.000717654	0.000491832
Bacteria;__Proteobacteria;__Deltaproteobacteria;__Desulfurellales;__Desulfurellaceae;__uncultured	0.000106775	0.000136696	0.000245916
Bacteria;__Actinobacteria;__Actinobacteria;__Corynebacteriales;__Mycobacteriaceae;__Mycobacterium	0.000347018	0.00034174	0.000562094
Bacteria;__Proteobacteria;__Gammaproteobacteria;__Legionellales;__Coxiellaceae;__Coxiella	2.66937e-05	0.000136696	0
Bacteria;__Proteobacteria;__Alphaproteobacteria;__Rhodobacterales;__Rhodobacteraceae;__Leisingera	2.66937e-05	6.8348e-05	0.000245916
Bacteria;__Bacteroidetes;__Cytophagia;__Order_II_Incertae_Sedis;__Rhodothermaceae;__uncultured	5.33874e-05	6.8348e-05	3.51309e-05
Bacteria;__Proteobacteria;__Alphaproteobacteria;__Rhodobacterales;__Rhodobacteraceae;__uncultured	5.33874e-05	6.8348e-05	0.000105393
Bacteria;__Firmicutes;__Clostridia;__Clostridiales;__Family_XIII_Incertae_Sedis;Other	0	0	7.02617e-05
Bacteria;__Cyanobacteria;__4C0d-2;__o;__f;__g	5.33874e-05	0.00017087	0.000105393
Bacteria;__Firmicutes;__OPB54;__o;__f;__g	0	0	0
Bacteria;__Proteobacteria;__Gammaproteobacteria;__Pseudomonadales;__Moraxellaceae;__Acinetobacter	0.000160162	0.000102522	7.02617e-05
Archaea;__Euryarchaeota;__Thermoplasmata;__Thermoplasmatales;__ASC21;__g	8.00811e-05	0.000205044	0.000140523
Bacteria;__Proteobacteria;__Gammaproteobacteria;__CS-B046;__f;__g	0.000106775	0.000375914	0.000386439
Bacteria;__Firmicutes;__Clostridia;__Clostridiales;__Peptococcaceae;__uncultured	8.00811e-05	6.8348e-05	3.51309e-05
Bacteria;__Proteobacteria;__Deltaproteobacteria;__GR-WP33-30;__f;__g	0.000160162	0.000136696	0.000281047
Archaea;__Thaumarchaeota;__Marine_Group_I;Other;Other;Other	5.33874e-05	0	0
Bacteria;__Acidobacteria;Other;Other;Other;Other	0.000106775	0	7.02617e-05
Bacteria;__Proteobacteria;__Alphaproteobacteria;__Rhodospirillales;Other;Other	5.33874e-05	6.8348e-05	0
Archaea;__Euryarchaeota;__Thermoplasmata;__19c-33;__f;__g	0	0	0
Bacteria;__Planctomycetes;__Planctomycetacia;__Planctomycetales;__Planctomycetaceae;__Planctomyces	0.000240243	0.00034174	0.000316178
Archaea;__Euryarchaeota;__Methanomicrobia;__Methanosarcinales;__Methanosaetaceae;__Methanosaeta	2.66937e-05	0	3.51309e-05
Bacteria;__Firmicutes;__Clostridia;__Clostridiales;__Peptococcaceae;__Desulfitibacter	0	0	0
Bacteria;__Firmicutes;__Clostridia;__Clostridiales;__Family_XI_Incertae_Sedis;__Tissierella	0	0	0
Bacteria;__Proteobacteria;__Deltaproteobacteria;__Syntrophobacterales;__Syntrophaceae;__uncultured	5.33874e-05	0.000136696	0.000245916
Bacteria;__Proteobacteria;__Gammaproteobacteria;__Sva0071;__f;__g	0.00021355	0.000102522	0.000105393
Bacteria;__Proteobacteria;__Deltaproteobacteria;__43F-1404R;__f;__g	0.00021355	3.4174e-05	0.000140523
Bacteria;__Acidobacteria;__Acidobacteria;__AT-s3-28;__f;__g	2.66937e-05	0.000102522	0.000140523
Bacteria;__Actinobacteria;__Acidimicrobiia;__Acidimicrobiales;__Acidimicrobiaceae;__uncultured	5.33874e-05	0.000136696	0.000105393
Bacteria;__Bacteroidetes;__vadinHA17;__o;__f;__g	5.33874e-05	6.8348e-05	0.000140523
Bacteria;__Firmicutes;__Clostridia;__Clostridiales;__Peptostreptococcaceae;__Incertae_Sedis	2.66937e-05	3.4174e-05	0.000175654
Bacteria;__Planctomycetes;__SGST604;__o;__f;__g	0.000160162	0.000273392	0
Bacteria;__Proteobacteria;__Deltaproteobacteria;__Myxococcales;__uncultured;__g	0.000347018	0.00034174	0.000456701
Bacteria;__Elusimicrobia;__Elusimicrobia;__Lineage_I_(Endomicrobia);__f;__g	0	3.4174e-05	3.51309e-05
Bacteria;__Actinobacteria;__Thermoleophilia;__Solirubrobacterales;__480-2;__g	5.33874e-05	0.00017087	0.000175654
Bacteria;__Firmicutes;__Clostridia;__Clostridiales;__Syntrophomonadaceae;Other	0	0	0
Bacteria;__Actinobacteria;__Actinobacteria;__Propionibacteriales;__Propionibacteriaceae;__Propionibacterium	0	0	0
Bacteria;__Candidate_division_OD1;__c;__o;__f;__g	0.00336341	0.00321236	0.00214298
Bacteria;__Proteobacteria;__Deltaproteobacteria;__Myxococcales;__0319-6G20;__g	0.000106775	0.000102522	0.000175654
Bacteria;__Proteobacteria;__Epsilonproteobacteria;__Campylobacterales;__Campylobacteraceae;__Arcobacter	0.00130799	0.00109357	0.00080801
Bacteria;__Proteobacteria;__Gammaproteobacteria;__NKB5;__f;__g	0	0	0
Bacteria;__Actinobacteria;__Actinobacteria;__Pseudonocardiales;__Pseudonocardiaceae;__Pseudonocardia	5.33874e-05	3.4174e-05	7.02617e-05
Bacteria;__Chloroflexi;__KD4-96;__o;__f;__g	0.000293631	0.000307566	0.000526963
Archaea;__Euryarchaeota;__Methanobacteria;__Methanobacteriales;__Methanobacteriaceae;__Methanobrevibacter	0	3.4174e-05	0
Bacteria;__Actinobacteria;__Actinobacteria;__Corynebacteriales;__Corynebacteriaceae;__Corynebacterium	0	0	0
Bacteria;__Actinobacteria;__Actinobacteria;__Micrococcales;__Intrasporangiaceae;Other	0	0	0
Bacteria;__Actinobacteria;__Actinobacteria;__Streptomycetales;__Streptomycetaceae;__Streptomyces	5.33874e-05	3.4174e-05	0.000140523
Bacteria;__Bacteroidetes;__Flavobacteria;__Flavobacteriales;__Cryomorphaceae;Other	0	0	0
Bacteria;__Bacteroidetes;__Flavobacteria;__Flavobacteriales;__Flavobacteriaceae;__Robiginitalea	2.66937e-05	0	0
Bacteria;__Bacteroidetes;__Sphingobacteriia;__Sphingobacteriales;__Saprospiraceae;__uncultured	8.00811e-05	3.4174e-05	0
Bacteria;__Elusimicrobia;__Elusimicrobia;Other;Other;Other	8.00811e-05	3.4174e-05	3.51309e-05
Bacteria;__Firmicutes;__Clostridia;__Clostridiales;__JTB215;__g	0	0	0
Bacteria;__Firmicutes;__Clostridia;__Clostridiales;__Ruminococcaceae;__Incertae_Sedis	0	0	0
Bacteria;__Firmicutes;__Clostridia;__Halanaerobiales;__Halanaerobiaceae;__Halocella	0	0	0
Bacteria;__Proteobacteria;__Betaproteobacteria;__Burkholderiales;__Comamonadaceae;Other	0	3.4174e-05	0
Bacteria;__Proteobacteria;__Betaproteobacteria;__Nitrosomonadales;__Nitrosomonadaceae;__Nitrosomonas	2.66937e-05	3.4174e-05	3.51309e-05
Bacteria;__Proteobacteria;__Deltaproteobacteria;__Bdellovibrionales;__Bacteriovoracaceae;__HotSeep-1	0	0	0
Bacteria;__Proteobacteria;__Deltaproteobacteria;__Myxococcales;Other;Other	8.00811e-05	0.000205044	7.02617e-05
Bacteria;__Proteobacteria;__Gammaproteobacteria;__Enterobacteriales;__Enterobacteriaceae;__Morganella	0	0	0
Bacteria;__Proteobacteria;__SC3-20;__o;__f;__g	0	0	0
Bacteria;__Proteobacteria;__Gammaproteobacteria;__E01-9C-26_marine_group;__f;__g	5.33874e-05	3.4174e-05	0
Bacteria;__Proteobacteria;__Deltaproteobacteria;__Desulfuromonadales;__Geobacteraceae;__Geobacter	0.000133469	0.000136696	0.000210785
Bacteria;__Proteobacteria;__Deltaproteobacteria;__Desulfuromonadales;__Desulfuromonadaceae;__Desulfuromusa	0.000133469	0.000205044	0.000245916
Bacteria;__Bacteroidetes;__Cytophagia;__Cytophagales;__Flammeovirgaceae;__uncultured	0.000293631	0.000273392	0.000351309
Bacteria;__Chlamydiae;__Chlamydiae;__Chlamydiales;Other;Other	0.000186856	0.000239218	0.000316178
Bacteria;__Actinobacteria;__Thermoleophilia;__Solirubrobacterales;Other;Other	8.00811e-05	3.4174e-05	0
Bacteria;__Chloroflexi;__MSB-5B2;__o;__f;__g	2.66937e-05	3.4174e-05	7.02617e-05
Bacteria;__Proteobacteria;__Deltaproteobacteria;__Desulfarculales;__Desulfarculaceae;__Desulfarculus	0	0	0
Bacteria;__Verrucomicrobia;__Opitutae;__Opitutales;__Opitutaceae;__Opitutus	5.33874e-05	0.000102522	7.02617e-05
Bacteria;__Proteobacteria;__Gammaproteobacteria;__Alteromonadales;__Ferrimonadaceae;__Ferrimonas	0	3.4174e-05	0
Bacteria;__Proteobacteria;__Gammaproteobacteria;__Chromatiales;__Ectothiorhodospiraceae;__Thioalkalispira	2.66937e-05	0	3.51309e-05
Bacteria;__Actinobacteria;__Actinobacteria;__Frankiales;__Geodermatophilaceae;__Blastococcus	0.000133469	6.8348e-05	0
Bacteria;__Firmicutes;__Bacilli;__Bacillales;Other;Other	0.000106775	0	3.51309e-05
Bacteria;__Proteobacteria;__Gammaproteobacteria;__Alteromonadales;__Alteromonadaceae;__OM60(NOR5)_clade	5.33874e-05	6.8348e-05	0.000105393
Bacteria;__Verrucomicrobia;__Verrucomicrobiae;__Verrucomicrobiales;__Verrucomicrobiaceae;__uncultured	2.66937e-05	3.4174e-05	0
Archaea;__Euryarchaeota;__Halobacteria;__Halobacteriales;__SM1K20;__g	0.000160162	0.000102522	7.02617e-05
Archaea;__Thaumarchaeota;__Soil_Crenarchaeotic_Group(SCG);__o;__f;__g	5.33874e-05	3.4174e-05	0
Bacteria;__Acidobacteria;__Acidobacteria;__Subgroup_18;__f;__g	0	3.4174e-05	0
Bacteria;__Acidobacteria;__Holophagae;__Subgroup_10;__NS72;__g	0	0	0
Bacteria;__Actinobacteria;__Actinobacteria;Other;Other;Other	0	0	0
Bacteria;__Actinobacteria;__Actinobacteria;__Micrococcales;__Microbacteriaceae;__Microbacterium	0	0	0
Bacteria;__Actinobacteria;__Actinobacteria;__Streptosporangiales;__Thermomonosporaceae;__Actinoallomurus	0	0	0
Bacteria;__Actinobacteria;__Thermoleophilia;__Solirubrobacterales;__0319-6M6;__g	0	3.4174e-05	0
Bacteria;__Bacteroidetes;__Flavobacteria;__Flavobacteriales;__Flavobacteriaceae;__Lutibacter	0.000106775	3.4174e-05	7.02617e-05
Bacteria;__Elusimicrobia;__Elusimicrobia;__Lineage_IIb;__f;__g	8.00811e-05	6.8348e-05	0
Bacteria;__Elusimicrobia;__Elusimicrobia;__MD2894-B20;__f;__g	8.00811e-05	0.000307566	0.000351309
Bacteria;__Firmicutes;__Clostridia;__Clostridiales;__Lachnospiraceae;__Butyrivibrio	0	3.4174e-05	0
Bacteria;__Firmicutes;__Clostridia;__Clostridiales;__Ruminococcaceae;__uncultured	5.33874e-05	3.4174e-05	0.000140523
Bacteria;__Lentisphaerae;__Lentisphaeria;__WCHB1-41;__f;__g	0.000160162	6.8348e-05	0.000456701
Bacteria;__Planctomycetes;Other;Other;Other;Other	0.000240243	6.8348e-05	0.000210785
Bacteria;__Planctomycetes;__Planctomycetacia;__Brocadiales;__Brocadiaceae;__Candidatus_Scalindua	0.000106775	0	3.51309e-05
Bacteria;__Proteobacteria;__Alphaproteobacteria;__Rhizobiales;__Bradyrhizobiaceae;__Bradyrhizobium	2.66937e-05	0	3.51309e-05
Bacteria;__Proteobacteria;__Alphaproteobacteria;__Rhodospirillales;__Rhodospirillaceae;__Defluviicoccus	0	0	3.51309e-05
Bacteria;__Proteobacteria;__Deltaproteobacteria;__Myxococcales;__VHS-B3-70;__g	0.000133469	0.000205044	0.000175654
Bacteria;__Proteobacteria;__Gammaproteobacteria;__Chromatiales;__Chromatiaceae;__Nitrosococcus	2.66937e-05	3.4174e-05	0
Bacteria;__Proteobacteria;__Gammaproteobacteria;__Methylococcales;Other;Other	5.33874e-05	0	0
Bacteria;__Tenericutes;__Mollicutes;__Acholeplasmatales;__Acholeplasmataceae;__Acholeplasma	0	0	0
Bacteria;__Firmicutes;__Clostridia;__Clostridiales;__Clostridiaceae;__Clostridiisalibacter	0	0	0
Bacteria;__Firmicutes;__Clostridia;__Clostridiales;__Eubacteriaceae;__Garciella	0	0	0
Eukaryota;__Opisthokonta;__Nucletmycea;__Fungi;__Dikarya;__Ascomycota	0	0	0
Bacteria;__Actinobacteria;__Actinobacteria;__Micrococcales;__Bogoriellaceae;__Georgenia	0	3.4174e-05	0
Bacteria;__Proteobacteria;__Gammaproteobacteria;__Thiotrichales;__Piscirickettsiaceae;__Thiomicrospira	5.33874e-05	0.000307566	0.000316178
Bacteria;__Firmicutes;__Bacilli;__Bacillales;__Paenibacillaceae;__Paenibacillus	0	0	0
Bacteria;__Acidobacteria;__Holophagae;__TPD-58;__f;__g	0	6.8348e-05	0
Bacteria;__Firmicutes;__Erysipelotrichi;__Erysipelotrichales;__Erysipelotrichaceae;__Turicibacter	0	3.4174e-05	0
Bacteria;__CK-1C4-19;__c;__o;__f;__g	0	0	0
Bacteria;__Verrucomicrobia;__Verrucomicrobiae;__Verrucomicrobiales;__Rubritaleaceae;__Rubritalea	2.66937e-05	0.000102522	3.51309e-05
Bacteria;__Firmicutes;__Bacilli;__Bacillales;__Staphylococcaceae;__Staphylococcus	2.66937e-05	0	0
Bacteria;__Proteobacteria;__Alphaproteobacteria;__OCS116_clade;__f;__g	2.66937e-05	3.4174e-05	0
Bacteria;__Proteobacteria;__Alphaproteobacteria;__Rhodobacterales;__Rhodobacteraceae;__Phaeobacter	0	0	0
Bacteria;__Bacteroidetes;__Cytophagia;__Cytophagales;__Flammeovirgaceae;Other	0.000133469	0.00017087	3.51309e-05
Bacteria;__Proteobacteria;__Alphaproteobacteria;__Rhizobiales;__Phyllobacteriaceae;__Ahrensia	2.66937e-05	3.4174e-05	7.02617e-05
Bacteria;__Proteobacteria;__Deltaproteobacteria;__Syntrophobacterales;__Syntrophaceae;__Desulfomonile	2.66937e-05	6.8348e-05	0
Bacteria;__Spirochaetae;__Spirochaetes;__MSBL2;__f;__g	8.00811e-05	3.4174e-05	3.51309e-05
Bacteria;__Firmicutes;__Bacilli;__Bacillales;__Planococcaceae;Other	0	0	0
Bacteria;__Lentisphaerae;__Lentisphaeria;__LD1-PB3;__f;__g	0	0	0
Archaea;__Euryarchaeota;__Thermoplasmata;__Thermoplasmatales;__Marine_Group_II;__g	0	0	0
Bacteria;__Chlorobi;__Ignavibacteria;__Ignavibacteriales;__IheB3-7;__g	0.000427099	0.000239218	0.000175654
Bacteria;__Firmicutes;__Bacilli;Other;Other;Other	0	0	0
Bacteria;__Firmicutes;__Bacilli;__Lactobacillales;__Carnobacteriaceae;__Atopostipes	0	0	0
Bacteria;__Planctomycetes;__Phycisphaerae;__C86;__f;__g	2.66937e-05	0.000102522	3.51309e-05
Bacteria;__Proteobacteria;__Deltaproteobacteria;__Desulfobacterales;__Desulfobacteraceae;__Desulfonema	0	0	0
Bacteria;__Proteobacteria;__Milano-WF1B-44;__o;__f;__g	0	0	0
Bacteria;__Verrucomicrobia;__Verrucomicrobiae;__Verrucomicrobiales;__DEV007;__g	0.000160162	0	7.02617e-05
Bacteria;__Actinobacteria;__Actinobacteria;__Propionibacteriales;__Nocardioidaceae;__Marmoricola	0	0	0
Bacteria;__Actinobacteria;__Coriobacteriia;__Coriobacteriales;__Coriobacteriaceae;__uncultured	0.000133469	0.00017087	0.000210785
Bacteria;__Actinobacteria;__Thermoleophilia;__Solirubrobacterales;__Solirubrobacteraceae;__Solirubrobacter	2.66937e-05	0	0
Bacteria;__BD1-5;__c;__o;__f;__g	0.000427099	0.000205044	0.00042157
Bacteria;__Bacteroidetes;__Sphingobacteriia;__Sphingobacteriales;__Saprospiraceae;__Portibacter	0	0	0
Bacteria;__Proteobacteria;__Alphaproteobacteria;__Rickettsiales;__Family_Incertae_Sedis;__Candidatus_Captivus	0	0	0
Bacteria;__Proteobacteria;__Betaproteobacteria;__Hydrogenophilales;__Hydrogenophilaceae;__Hydrogenophilus	0	0	0
Bacteria;__Proteobacteria;__Gammaproteobacteria;__Alteromonadales;__Moritellaceae;__Moritella	2.66937e-05	3.4174e-05	3.51309e-05
Bacteria;__Proteobacteria;__Gammaproteobacteria;__Chromatiales;__Granulosicoccaceae;__Granulosicoccus	5.33874e-05	0	0
Bacteria;__Proteobacteria;__Gammaproteobacteria;__Legionellales;__Legionellaceae;__uncultured	0	0	0
Bacteria;__Proteobacteria;__JTB23;__o;__f;__g	0	0	0
Archaea;__Thaumarchaeota;__Marine_Group_I;__Order_Incertae_Sedis;__Family_Incertae_Sedis;__Candidatus_Nitrosopumilus	0	0	0
Bacteria;__Actinobacteria;__Actinobacteria;__Micrococcales;Other;Other	0	0	0
Bacteria;__Actinobacteria;__Actinobacteria;__Propionibacteriales;__Nocardioidaceae;__Kribbella	0	3.4174e-05	0
Bacteria;__Actinobacteria;__Thermoleophilia;__Solirubrobacterales;__288-2;__g	0	3.4174e-05	3.51309e-05
Bacteria;__Firmicutes;__Bacilli;__Bacillales;__Planococcaceae;__Incertae_Sedis	0	0	0
Bacteria;__Nitrospirae;__Nitrospira;__Nitrospirales;__wb1-A12;__g	0	0	0
Bacteria;__Proteobacteria;__Alphaproteobacteria;__Caulobacterales;__Hyphomonadaceae;__Robiginitomaculum	0	0	0
Bacteria;__Proteobacteria;__Alphaproteobacteria;__Rhodospirillales;__Rhodospirillaceae;__Skermanella	0	0	0
Bacteria;__Proteobacteria;__Alphaproteobacteria;__Rickettsiales;__mitochondria;__g	0.000106775	0	0
Bacteria;__Proteobacteria;__Deltaproteobacteria;__Bdellovibrionales;__Bdellovibrionaceae;__OM27_clade	0	0	0
Bacteria;__Proteobacteria;__Gammaproteobacteria;__Enterobacteriales;__Enterobacteriaceae;__Salmonella	0	0	0
Bacteria;__Tenericutes;__Mollicutes;Other;Other;Other	0	0	0
Archaea;__Euryarchaeota;Other;Other;Other;Other	2.66937e-05	3.4174e-05	0
Bacteria;__Actinobacteria;Other;Other;Other;Other	2.66937e-05	0	0
Bacteria;__Actinobacteria;__Acidimicrobiia;__Acidimicrobiales;__uncultured;__g	0.000133469	6.8348e-05	7.02617e-05
Bacteria;__Chlamydiae;__Chlamydiae;__Chlamydiales;__cvE6;__g	0	6.8348e-05	7.02617e-05
Bacteria;__Chlorobi;__Chlorobia;__Chlorobiales;__SJA-28;__g	2.66937e-05	0.000205044	0.000140523
Bacteria;__Cyanobacteria;__ML635J-21;__o;__f;__g	0.000133469	0	0.000105393
Bacteria;__Lentisphaerae;__Lentisphaeria;__Victivallales;__Victivallaceae;__Victivallis	0	0	0.000140523
Bacteria;__Planctomycetes;__Phycisphaerae;__Phycisphaerales;__SBYZ-1154;__g	0	0	0
Bacteria;__Proteobacteria;__Deltaproteobacteria;__Desulfobacterales;__Desulfobacteraceae;__Desulfosarcina	2.66937e-05	3.4174e-05	7.02617e-05
Bacteria;__Proteobacteria;__Gammaproteobacteria;__Alteromonadales;__Psychromonadaceae;__Psychromonas	0.000133469	0.00017087	3.51309e-05
Bacteria;__Proteobacteria;__Gammaproteobacteria;__Vibrionales;__Vibrionaceae;__Vibrio	0	0	0
Bacteria;__Spirochaetae;__Spirochaetes;__Spirochaetales;__Spirochaetaceae;Other	0	0	0
Archaea;__Euryarchaeota;__Methanomicrobia;__D-C06;__f;__g	2.66937e-05	6.8348e-05	0.000140523
Archaea;__Euryarchaeota;__Methanomicrobia;__Methanosarcinales;__GOM_Arc_I;__g	0	3.4174e-05	0
Archaea;__Euryarchaeota;__Thermoplasmata;__20a-9;__f;__g	2.66937e-05	0	0
Archaea;__Euryarchaeota;__Thermoplasmata;__South_African_Goldmine_Gp(SAGMEG);__f;__g	0.000133469	0.000102522	3.51309e-05
Archaea;__Euryarchaeota;__Thermoplasmata;__Thermoplasmatales;__AMOS4A-452-E11;__g	0	0	7.02617e-05
Archaea;__Euryarchaeota;__Thermoplasmata;__Thermoplasmatales;__Marine_Group_III;__g	2.66937e-05	0	0
Archaea;__Thaumarchaeota;__Marine_Benthic_Group_A;__o;__f;__g	0	3.4174e-05	0
Archaea;__Thaumarchaeota;__Soil_Crenarchaeotic_Group(SCG);Other;Other;Other	0	0	0
Archaea;__Thaumarchaeota;__Soil_Crenarchaeotic_Group(SCG);__Order_Incertae_Sedis;__Family_Incertae_Sedis;__Candidatus_Nitrososphaera	0	0	0
Bacteria;__Acidobacteria;__Acidobacteria;__Subgroup_3;__Family_Incertae_Sedis;__Bryobacter	2.66937e-05	3.4174e-05	0
Bacteria;__Acidobacteria;__Acidobacteria;__Subgroup_3;__PAUC26f;__g	0	3.4174e-05	7.02617e-05
Bacteria;__Acidobacteria;__Acidobacteria;__Subgroup_4;__Family_Incertae_Sedis;__Blastocatella	2.66937e-05	0	0
Bacteria;__Acidobacteria;__Acidobacteria;__d142;__f;__g	0	0	0
Bacteria;__Acidobacteria;__Holophagae;__Subgroup_10;Other;Other	0	0	0
Bacteria;__Acidobacteria;__Holophagae;__Subgroup_23;Other;Other	0	0	0
Bacteria;__Acidobacteria;__Holophagae;__Subgroup_23;__FW34;__g	0	0	0
Bacteria;__Actinobacteria;__Acidimicrobiia;__Acidimicrobiales;Other;Other	8.00811e-05	0	0.000105393
Bacteria;__Actinobacteria;__Acidimicrobiia;__Acidimicrobiales;__Family_Incertae_Sedis;__Candidatus_Microthrix	0	3.4174e-05	0
Bacteria;__Actinobacteria;__Acidimicrobiia;__Acidimicrobiales;__Sva0996_marine_group;__g	5.33874e-05	0	0
Bacteria;__Actinobacteria;__Actinobacteria;__Bifidobacteriales;__Bifidobacteriaceae;__Bifidobacterium	0	0	3.51309e-05
Bacteria;__Actinobacteria;__Actinobacteria;__Corynebacteriales;Other;Other	0	0	0
Bacteria;__Actinobacteria;__Actinobacteria;__Corynebacteriales;__Dietziaceae;__Dietzia	0	0	0
Bacteria;__Actinobacteria;__Actinobacteria;__Corynebacteriales;__Nocardiaceae;__Gordonia	5.33874e-05	3.4174e-05	3.51309e-05
Bacteria;__Actinobacteria;__Actinobacteria;__Corynebacteriales;__Tsukamurellaceae;__Tsukamurella	0	0	0
Bacteria;__Actinobacteria;__Actinobacteria;__Frankiales;__Frankiaceae;__Frankia	0	0	0
Bacteria;__Actinobacteria;__Actinobacteria;__Frankiales;__Geodermatophilaceae;Other	0	0	0.000210785
Bacteria;__Actinobacteria;__Actinobacteria;__Frankiales;__Geodermatophilaceae;__Modestobacter	0	0.000136696	0.000105393
Bacteria;__Actinobacteria;__Actinobacteria;__Frankiales;__Nakamurellaceae;__Nakamurella	0	0	0
Bacteria;__Actinobacteria;__Actinobacteria;__Micrococcales;__Cellulomonadaceae;Other	0	0	0
Bacteria;__Actinobacteria;__Actinobacteria;__Micrococcales;__Microbacteriaceae;Other	0	0	0.000105393
Bacteria;__Actinobacteria;__Actinobacteria;__Micrococcales;__Microbacteriaceae;__Leucobacter	0	0	0
Bacteria;__Actinobacteria;__Actinobacteria;__Micrococcales;__Micrococcaceae;Other	0	0	0
Bacteria;__Actinobacteria;__Actinobacteria;__Micrococcales;__Micrococcaceae;__Arthrobacter	8.00811e-05	0.00017087	0.000140523
Bacteria;__Actinobacteria;__Actinobacteria;__Micrococcales;__Micrococcaceae;__Rothia	0	0	0
Bacteria;__Actinobacteria;__Actinobacteria;__Micromonosporales;__Micromonosporaceae;Other	2.66937e-05	3.4174e-05	0
Bacteria;__Actinobacteria;__Actinobacteria;__Micromonosporales;__Micromonosporaceae;__Asanoa	0	0	0
Bacteria;__Actinobacteria;__Actinobacteria;__Micromonosporales;__Micromonosporaceae;__Micromonospora	0	0	0
Bacteria;__Actinobacteria;__Actinobacteria;__Micromonosporales;__Micromonosporaceae;__Plantactinospora	0	0	0
Bacteria;__Actinobacteria;__Actinobacteria;__Propionibacteriales;__Nocardioidaceae;Other	2.66937e-05	0	3.51309e-05
Bacteria;__Actinobacteria;__Actinobacteria;__Propionibacteriales;__Nocardioidaceae;__Nocardioides	0	0	0
Bacteria;__Actinobacteria;__Actinobacteria;__Pseudonocardiales;__Pseudonocardiaceae;Other	0	0	0
Bacteria;__Actinobacteria;__Actinobacteria;__Pseudonocardiales;__Pseudonocardiaceae;__Actinomycetospora	5.33874e-05	0	0
Bacteria;__Actinobacteria;__Actinobacteria;__Streptosporangiales;__Streptosporangiaceae;__Sphaerisporangium	0	0	0
Bacteria;__Actinobacteria;__Actinobacteria;__Streptosporangiales;__Thermomonosporaceae;Other	0	0	3.51309e-05
Bacteria;__Actinobacteria;__Actinobacteria;__Streptosporangiales;__Thermomonosporaceae;__Actinomadura	0	0	0
Bacteria;__Actinobacteria;__Coriobacteriia;__Coriobacteriales;__Coriobacteriaceae;__Collinsella	0	3.4174e-05	7.02617e-05
Bacteria;__Actinobacteria;__MB-A2-108;__o;__f;__g	0	0	0
Bacteria;__Actinobacteria;__Rubrobacteria;__Rubrobacterales;__Rubrobacteriaceae;__Rubrobacter	0	3.4174e-05	0
Bacteria;__Actinobacteria;__Thermoleophilia;Other;Other;Other	0	0	0
Bacteria;__Actinobacteria;__Thermoleophilia;__Gaiellales;Other;Other	0	0	0
Bacteria;__Bacteroidetes;__Bacteroidia;__Bacteroidales;__Marinilabiaceae;__Marinifilum	0	0	0.000140523
Bacteria;__Bacteroidetes;__Bacteroidia;__Bacteroidales;__Prevotellaceae;__Prevotella	0	0	0
Bacteria;__Bacteroidetes;__Cytophagia;__Cytophagales;Other;Other	0	0	0
Bacteria;__Bacteroidetes;__Cytophagia;__Cytophagales;__Flammeovirgaceae;__Flexithrix	0	0	3.51309e-05
Bacteria;__Bacteroidetes;__Cytophagia;__Order_II_Incertae_Sedis;__Rhodothermaceae;Other	5.33874e-05	6.8348e-05	7.02617e-05
Bacteria;__Bacteroidetes;__Cytophagia;__Order_II_Incertae_Sedis;__Rhodothermaceae;__Rubricoccus	0.000133469	3.4174e-05	7.02617e-05
Bacteria;__Bacteroidetes;__Flavobacteria;__Flavobacteriales;__Cryomorphaceae;__Crocinitomix	0	0	0
Bacteria;__Bacteroidetes;__Flavobacteria;__Flavobacteriales;__Cryomorphaceae;__Fluviicola	2.66937e-05	0	3.51309e-05
Bacteria;__Bacteroidetes;__Flavobacteria;__Flavobacteriales;__Flavobacteriaceae;__Bergeyella	0	0	0
Bacteria;__Bacteroidetes;__Flavobacteria;__Flavobacteriales;__Flavobacteriaceae;__Chryseobacterium	0	0	0
Bacteria;__Bacteroidetes;__Flavobacteria;__Flavobacteriales;__Flavobacteriaceae;__Maribacter	0	0.000102522	7.02617e-05
Bacteria;__Bacteroidetes;__Flavobacteria;__Flavobacteriales;__Flavobacteriaceae;__Zeaxanthinibacter	0	0	7.02617e-05
Bacteria;__Bacteroidetes;__Flavobacteria;__Flavobacteriales;__NS9_marine_group;__g	0	0	0
Bacteria;__Bacteroidetes;__Sphingobacteriia;__Sphingobacteriales;__Chitinophagaceae;Other	0	0	0
Bacteria;__Bacteroidetes;__Sphingobacteriia;__Sphingobacteriales;__Chitinophagaceae;__Ferruginibacter	0	0	0
Bacteria;__Bacteroidetes;__Sphingobacteriia;__Sphingobacteriales;__Chitinophagaceae;__uncultured	0	0	0
Bacteria;__Bacteroidetes;__Sphingobacteriia;__Sphingobacteriales;__ST-12K33;__g	5.33874e-05	3.4174e-05	7.02617e-05
Bacteria;__Bacteroidetes;__Sphingobacteriia;__Sphingobacteriales;__Saprospiraceae;Other	0.000133469	0.000273392	0
Bacteria;__Bacteroidetes;__Sphingobacteriia;__Sphingobacteriales;__Saprospiraceae;__Aureispira	0	0	0
Bacteria;__Bacteroidetes;__Sphingobacteriia;__Sphingobacteriales;__Sphingobacteriaceae;Other	0	0	0
Bacteria;__Bacteroidetes;__Sphingobacteriia;__Sphingobacteriales;__Sphingobacteriaceae;__Solitalea	0	0	0
Bacteria;__Bacteroidetes;__Sphingobacteriia;__Sphingobacteriales;__Sphingobacteriaceae;__Sphingobacterium	0	0	0
Bacteria;__Candidate_division_SR1;__c;__o;__f;__g	0	0	0
Bacteria;__Chlamydiae;__Chlamydiae;__Chlamydiales;__Chlamydiaceae;__uncultured	0	0	0.000140523
Bacteria;__Chlamydiae;__Chlamydiae;__Chlamydiales;__Parachlamydiaceae;Other	5.33874e-05	3.4174e-05	7.02617e-05
Bacteria;__Chlamydiae;__Chlamydiae;__Chlamydiales;__Parachlamydiaceae;__Candidatus_Metachlamydia	0	0	0
Bacteria;__Chlamydiae;__Chlamydiae;__Chlamydiales;__Parachlamydiaceae;__Neochlamydia	0	0	0
Bacteria;__Chlamydiae;__Chlamydiae;__Chlamydiales;__Simkaniaceae;Other	0	0	0
Bacteria;__Chlamydiae;__Chlamydiae;__Chlamydiales;__Simkaniaceae;__uncultured	0.000106775	0	0
Bacteria;__Chlorobi;__Ignavibacteria;__Ignavibacteriales;__Ignavibacteriaceae;__Ignavibacterium	2.66937e-05	0	0.000140523
Bacteria;__Chloroflexi;__Anaerolineae;__Anaerolineales;__Anaerolineaceae;__Leptolinea	0	0	0
Bacteria;__Chloroflexi;__Anaerolineae;__Anaerolineales;__Anaerolineaceae;__Longilinea	2.66937e-05	0	0
Bacteria;__Chloroflexi;__Dehalococcoidia;__Sh765B-AG-111;__f;__g	0	3.4174e-05	0
Bacteria;__Chloroflexi;__KZNMV-5-B42;__o;__f;__g	0	0	0.000175654
Bacteria;__Chloroflexi;__Ktedonobacteria;__C0119;__f;__g	0	0	0
Bacteria;__Chloroflexi;__SAR202_clade;__o;__f;__g	5.33874e-05	0.000205044	0.000140523
Bacteria;__Chloroflexi;__Thermomicrobia;__AKYG1722;__f;__g	0	0	0.000105393
Bacteria;__Chloroflexi;__Thermomicrobia;__JG30-KF-CM45;__f;__g	0	6.8348e-05	7.02617e-05
Bacteria;__Deferribacteres;__Deferribacteres;__Deferribacterales;Other;Other	0	0	0
Bacteria;__Dictyoglomi;__Dictyoglomia;__Dictyoglomales;__Dictyoglomaceae;__Dictyoglomus	8.00811e-05	0.000136696	0.000175654
Bacteria;__Elusimicrobia;__Elusimicrobia;__40542;__f;__g	0	0	0
Bacteria;__Elusimicrobia;__Elusimicrobia;__Rs-M47;__f;__g	2.66937e-05	0	0
Bacteria;__Fibrobacteres;__Fibrobacteria;__Fibrobacterales;__09D2Z46;__g	0	6.8348e-05	0
Bacteria;__Fibrobacteres;__Fibrobacteria;__Fibrobacterales;__MAT-CR-H6-H10;__g	0	0	7.02617e-05
Bacteria;__Fibrobacteres;__Fibrobacteria;__Fibrobacterales;__SBYC;__g	0	0	0
Bacteria;__Fibrobacteres;__Fibrobacteria;__Fibrobacterales;__possible_family_01;__g	0	0	0
Bacteria;__Firmicutes;__Bacilli;__Bacillales;__Alicyclobacillaceae;__Tumebacillus	0	0	0
Bacteria;__Firmicutes;__Bacilli;__Bacillales;__Bacillaceae;Other	0	0	0
Bacteria;__Firmicutes;__Bacilli;__Bacillales;__Bacillaceae;__Alkalibacillus	0	0	0
Bacteria;__Firmicutes;__Bacilli;__Bacillales;__Bacillaceae;__Geobacillus	0	0	0
Bacteria;__Firmicutes;__Bacilli;__Bacillales;__Bacillaceae;__Lentibacillus	0	0	0
Bacteria;__Firmicutes;__Bacilli;__Bacillales;__Family_XI_Incertae_Sedis;__Gemella	0	0	0
Bacteria;__Firmicutes;__Bacilli;__Bacillales;__Paenibacillaceae;Other	0	0	0
Bacteria;__Firmicutes;__Bacilli;__Bacillales;__Paenibacillaceae;__Cohnella	0	0	0
Bacteria;__Firmicutes;__Bacilli;__Bacillales;__Thermoactinomycetaceae;Other	0	0	0
Bacteria;__Firmicutes;__Bacilli;__Lactobacillales;__Leuconostocaceae;__Fructobacillus	0	0	0
Bacteria;__Firmicutes;__Bacilli;__Lactobacillales;__Streptococcaceae;__Lactococcus	2.66937e-05	0	0
Bacteria;__Firmicutes;__Bacilli;__Lactobacillales;__Streptococcaceae;__Streptococcus	0.000133469	3.4174e-05	0
Bacteria;__Firmicutes;__Clostridia;__Clostridiales;__Christensenellaceae;__Christensenella	0	0	0
Bacteria;__Firmicutes;__Clostridia;__Clostridiales;__Eubacteriaceae;__uncultured	0	0	0
Bacteria;__Firmicutes;__Clostridia;__Clostridiales;__Family_Incertae_Sedis;__Dethiosulfatibacter	0	0	0
Bacteria;__Firmicutes;__Clostridia;__Clostridiales;__Family_XIII_Incertae_Sedis;__uncultured	0	0	0
Bacteria;__Firmicutes;__Clostridia;__Clostridiales;__Family_XI_Incertae_Sedis;__Incertae_Sedis	0	0	0
Bacteria;__Firmicutes;__Clostridia;__Clostridiales;__GoM-GC232-4463-Bac1;__g	0	0	0
Bacteria;__Firmicutes;__Clostridia;__Clostridiales;__Gracilibacteraceae;Other	0	0	0.000105393
Bacteria;__Firmicutes;__Clostridia;__Clostridiales;__Lachnospiraceae;Other	5.33874e-05	0	0
Bacteria;__Firmicutes;__Clostridia;__Clostridiales;__Lachnospiraceae;__Anaerosporobacter	0	0	0
Bacteria;__Firmicutes;__Clostridia;__Clostridiales;__Peptococcaceae;__Desulfitobacterium	0	0	0
Bacteria;__Firmicutes;__Clostridia;__Clostridiales;__Peptostreptococcaceae;Other	0	0	7.02617e-05
Bacteria;__Firmicutes;__Clostridia;__Halanaerobiales;__64K2;__g	0.00109444	0.00140113	0.00151063
Bacteria;__Firmicutes;__Clostridia;__Halanaerobiales;__Halobacteroidaceae;__uncultured	0	0	0
Bacteria;__Firmicutes;__Clostridia;__Natranaerobiales;__Natranaerobiaceae;__Natranaerobius	0	0	0
Bacteria;__Firmicutes;__Clostridia;__Thermoanaerobacterales;__Thermoanaerobacteraceae;__Syntrophaceticus	0	0	0
Bacteria;__Fusobacteria;__Fusobacteriia;__Fusobacteriales;__Fusobacteriaceae;Other	0	0	0
Bacteria;__Fusobacteria;__Fusobacteriia;__Fusobacteriales;__Fusobacteriaceae;__Fusobacterium	0	0	0
Bacteria;__Fusobacteria;__Fusobacteriia;__Fusobacteriales;__Fusobacteriaceae;__Propionigenium	5.33874e-05	0	0
Bacteria;__Fusobacteria;__Fusobacteriia;__MSBL6;__f;__g	0.00138807	0.00116192	0.000737748
Bacteria;__Gemmatimonadetes;__Gemmatimonadetes;__S0134_terrestrial_group;__f;__g	0	0	0
Bacteria;__Kazan-3B-28;__c;__o;__f;__g	0	0	0
Bacteria;__Lentisphaerae;__Lentisphaeria;__BS5;__f;__g	0	3.4174e-05	0
Bacteria;__Lentisphaerae;__Lentisphaeria;__LD1-PA20;__f;__g	0	0	0
Bacteria;__Lentisphaerae;__Lentisphaeria;__Victivallales;__Victivallaceae;Other	8.00811e-05	0	0
Bacteria;__Nitrospirae;__Nitrospira;__Nitrospirales;__Nitrospiraceae;__Nitrospira	2.66937e-05	3.4174e-05	0
Bacteria;__Planctomycetes;__BD7-11;__o;__f;__g	2.66937e-05	3.4174e-05	0
Bacteria;__Planctomycetes;__Phycisphaerae;__062DZ93_hypersaline_microbial_mat_group;__f;__g	0	3.4174e-05	0
Bacteria;__Planctomycetes;__Phycisphaerae;__Amsterdam-1B-07;__f;__g	2.66937e-05	0	0
Bacteria;__Planctomycetes;__Phycisphaerae;__ODP1230B3009;__f;__g	0	0.000102522	0.000245916
Bacteria;__Planctomycetes;__Phycisphaerae;__Phycisphaerales;__Phycisphaeraceae;__CL500-3	2.66937e-05	0	3.51309e-05
Bacteria;__Planctomycetes;__Phycisphaerae;__Phycisphaerales;__Phycisphaeraceae;__I-8	0.000106775	3.4174e-05	0
Bacteria;__Planctomycetes;__Phycisphaerae;__Phycisphaerales;__Phycisphaeraceae;__SM1A02	0	0	0
Bacteria;__Planctomycetes;__Phycisphaerae;__Phycisphaerales;__Phycisphaeraceae;__Z195MB87	0	0	0
Bacteria;__Planctomycetes;__Phycisphaerae;__S-70;__f;__g	0.000160162	0.000410088	0.000175654
Bacteria;__Planctomycetes;__Planctomycetacia;__Brocadiales;__Brocadiaceae;__PB79	0.000133469	0.000136696	0.000105393
Bacteria;__Planctomycetes;__Planctomycetacia;__Planctomycetales;__Planctomycetaceae;__Pirellula	0	0	0
Bacteria;__Proteobacteria;__AEGEAN-245;__o;__f;__g	0	0	3.51309e-05
Bacteria;__Proteobacteria;__Alphaproteobacteria;__Caulobacterales;__Caulobacteraceae;__Brevundimonas	0	0	0
Bacteria;__Proteobacteria;__Alphaproteobacteria;__Caulobacterales;__Caulobacteraceae;__Caulobacter	0	0	3.51309e-05
Bacteria;__Proteobacteria;__Alphaproteobacteria;__Caulobacterales;__Caulobacteraceae;__Phenylobacterium	0	0	0
Bacteria;__Proteobacteria;__Alphaproteobacteria;__Caulobacterales;__Hyphomonadaceae;__Hyphomonas	0	0	0
Bacteria;__Proteobacteria;__Alphaproteobacteria;__Caulobacterales;__Hyphomonadaceae;__uncultured	0	3.4174e-05	0
Bacteria;__Proteobacteria;__Alphaproteobacteria;__Parvularculales;__Parvularculaceae;__Parvularcula	0	0	0
Bacteria;__Proteobacteria;__Alphaproteobacteria;__Rhizobiales;Other;Other	8.00811e-05	6.8348e-05	7.02617e-05
Bacteria;__Proteobacteria;__Alphaproteobacteria;__Rhizobiales;__Bradyrhizobiaceae;__Bosea	0	0	0
Bacteria;__Proteobacteria;__Alphaproteobacteria;__Rhizobiales;__F0723;__g	0	0	0
Bacteria;__Proteobacteria;__Alphaproteobacteria;__Rhizobiales;__Hyphomicrobiaceae;__Hyphomicrobium	0	0	0
Bacteria;__Proteobacteria;__Alphaproteobacteria;__Rhizobiales;__Hyphomicrobiaceae;__Pedomicrobium	0	0	0
Bacteria;__Proteobacteria;__Alphaproteobacteria;__Rhizobiales;__Methylobacteriaceae;__Methylobacterium	0	0	0
Bacteria;__Proteobacteria;__Alphaproteobacteria;__Rhizobiales;__Phyllobacteriaceae;__Phyllobacterium	0	3.4174e-05	0
Bacteria;__Proteobacteria;__Alphaproteobacteria;__Rhizobiales;__Rhizobiaceae;__Rhizobium	0	0	0
Bacteria;__Proteobacteria;__Alphaproteobacteria;__Rhizobiales;__Xanthobacteraceae;__uncultured	0	0	0
Bacteria;__Proteobacteria;__Alphaproteobacteria;__Rhodobacterales;__Rhodobacteraceae;__Dinoroseobacter	0	0	7.02617e-05
Bacteria;__Proteobacteria;__Alphaproteobacteria;__Rhodobacterales;__Rhodobacteraceae;__Paracoccus	0	0	0
Bacteria;__Proteobacteria;__Alphaproteobacteria;__Rhodobacterales;__Rhodobacteraceae;__Roseobacter_clade_NAC11-7_lineage	0	0	0
Bacteria;__Proteobacteria;__Alphaproteobacteria;__Rhodobacterales;__Rhodobacteraceae;__Ruegeria	0	3.4174e-05	3.51309e-05
Bacteria;__Proteobacteria;__Alphaproteobacteria;__Rhodospirillales;__Acetobacteraceae;Other	0	0	3.51309e-05
Bacteria;__Proteobacteria;__Alphaproteobacteria;__Rhodospirillales;__Family_Incertae_Sedis;Other	0	0	0
Bacteria;__Proteobacteria;__Alphaproteobacteria;__Rhodospirillales;__Family_Incertae_Sedis;__Candidatus_Alysiosphaera	0	0	0
Bacteria;__Proteobacteria;__Alphaproteobacteria;__Rhodospirillales;__MSB-1E8;__g	0	0	7.02617e-05
Bacteria;__Proteobacteria;__Alphaproteobacteria;__Rhodospirillales;__Rhodospirillaceae;__Caenispirillum	0	0	0
Bacteria;__Proteobacteria;__Alphaproteobacteria;__Rickettsiales;__Anaplasmataceae;__Wolbachia	0	0	0
Bacteria;__Proteobacteria;__Alphaproteobacteria;__Rickettsiales;__Rickettsiaceae;__Rickettsia	0	0	0
Bacteria;__Proteobacteria;__Alphaproteobacteria;__Rickettsiales;__Rickettsiaceae;__uncultured	0	0	0
Bacteria;__Proteobacteria;__Alphaproteobacteria;__Rickettsiales;__S25-593;__g	0	0	0
Bacteria;__Proteobacteria;__Alphaproteobacteria;__Rickettsiales;__SM2D12;__g	0	0	0
Bacteria;__Proteobacteria;__Alphaproteobacteria;__Sphingomonadales;__Sphingomonadaceae;__Sphingobium	0	0	0
Bacteria;__Proteobacteria;__Alphaproteobacteria;__Sphingomonadales;__Sphingomonadaceae;__Sphingomonas	0	0	0
Bacteria;__Proteobacteria;__Alphaproteobacteria;__Sphingomonadales;__Sphingomonadaceae;__Zymomonas	0	0	0
Bacteria;__Proteobacteria;__Betaproteobacteria;Other;Other;Other	0	0	0
Bacteria;__Proteobacteria;__Betaproteobacteria;__Burkholderiales;__Burkholderiaceae;__Ralstonia	0	0	0
Bacteria;__Proteobacteria;__Betaproteobacteria;__Burkholderiales;__Comamonadaceae;__Aquabacterium	0	0	0
Bacteria;__Proteobacteria;__Betaproteobacteria;__Burkholderiales;__Comamonadaceae;__Delftia	0	0	0
Bacteria;__Proteobacteria;__Betaproteobacteria;__Burkholderiales;__Oxalobacteraceae;Other	0	0	0
Bacteria;__Proteobacteria;__Betaproteobacteria;__Burkholderiales;__Oxalobacteraceae;__Janthinobacterium	2.66937e-05	0	0
Bacteria;__Proteobacteria;__Betaproteobacteria;__Methylophilales;__Methylophilaceae;__OM43_clade	0	0	0
Bacteria;__Proteobacteria;__Betaproteobacteria;__Neisseriales;__Neisseriaceae;__Neisseria	0	0	0
Bacteria;__Proteobacteria;__Betaproteobacteria;__Neisseriales;__Neisseriaceae;__Snodgrassella	0	0	0
Bacteria;__Proteobacteria;__Betaproteobacteria;__Nitrosomonadales;__Nitrosomonadaceae;__uncultured	0	0	0
Bacteria;__Proteobacteria;__Betaproteobacteria;__Rhodocyclales;__Rhodocyclaceae;Other	5.33874e-05	0	0
Bacteria;__Proteobacteria;__Betaproteobacteria;__Rhodocyclales;__Rhodocyclaceae;__Methyloversatilis	0	0	0
Bacteria;__Proteobacteria;__Betaproteobacteria;__Rhodocyclales;__Rhodocyclaceae;__uncultured	0	0	0
Bacteria;__Proteobacteria;__Betaproteobacteria;__TRA3-20;__f;__g	0	0	0
Bacteria;__Proteobacteria;__Deltaproteobacteria;__Bdellovibrionales;__Bacteriovoracaceae;Other	0	0	7.02617e-05
Bacteria;__Proteobacteria;__Deltaproteobacteria;__Bdellovibrionales;__Bacteriovoracaceae;__Deferrisoma	5.33874e-05	0	0.000105393
Bacteria;__Proteobacteria;__Deltaproteobacteria;__Bdellovibrionales;__Bacteriovoracaceae;__Peredibacter	0	0	0
Bacteria;__Proteobacteria;__Deltaproteobacteria;__Desulfobacterales;__Desulfobacteraceae;__Desulfatirhabdium	0.000133469	0	3.51309e-05
Bacteria;__Proteobacteria;__Deltaproteobacteria;__Desulfobacterales;__Desulfobacteraceae;__Desulfobacter	0	0	0
Bacteria;__Proteobacteria;__Deltaproteobacteria;__Desulfobacterales;__Desulfobacteraceae;__Desulfobacterium	0.000480487	0.000375914	0
Bacteria;__Proteobacteria;__Deltaproteobacteria;__Desulfobacterales;__Desulfobacteraceae;__Desulfofaba	0	0	0
Bacteria;__Proteobacteria;__Deltaproteobacteria;__Desulfobacterales;__Desulfobacteraceae;__Desulfotignum	2.66937e-05	3.4174e-05	7.02617e-05
Bacteria;__Proteobacteria;__Deltaproteobacteria;__Desulfobacterales;__Desulfobulbaceae;__Desulfopila	0	0	7.02617e-05
Bacteria;__Proteobacteria;__Deltaproteobacteria;__Desulfobacterales;__Nitrospinaceae;__Candidatus_Entotheonella	0	0	0
Bacteria;__Proteobacteria;__Deltaproteobacteria;__Desulfobacterales;__Nitrospinaceae;__Nitrospina	0	3.4174e-05	0
Bacteria;__Proteobacteria;__Deltaproteobacteria;__Desulfovibrionales;__Desulfovibrionaceae;Other	0	0	0
Bacteria;__Proteobacteria;__Deltaproteobacteria;__Desulfuromonadales;Other;Other	2.66937e-05	0.000136696	7.02617e-05
Bacteria;__Proteobacteria;__Deltaproteobacteria;__Desulfuromonadales;__Desulfuromonadaceae;__Desulfuromonas	0	0	0
Bacteria;__Proteobacteria;__Deltaproteobacteria;__Desulfuromonadales;__GR-WP33-58;__g	5.33874e-05	3.4174e-05	0
Bacteria;__Proteobacteria;__Deltaproteobacteria;__Desulfuromonadales;__Sva1033;__g	2.66937e-05	3.4174e-05	0
Bacteria;__Proteobacteria;__Deltaproteobacteria;__Myxococcales;__Haliangiaceae;__Haliangium	0.000106775	0	0
Bacteria;__Proteobacteria;__Deltaproteobacteria;__Myxococcales;__Myxococcaceae;Other	0	0	0
Bacteria;__Proteobacteria;__Deltaproteobacteria;__Myxococcales;__Sandaracinaceae;Other	0	0	0
Bacteria;__Proteobacteria;__Deltaproteobacteria;__Myxococcales;__Sandaracinaceae;__Sandaracinus	0	0	0
Bacteria;__Proteobacteria;__Deltaproteobacteria;__Syntrophobacterales;__Syntrophaceae;__Desulfobacca	0	3.4174e-05	0
Bacteria;__Proteobacteria;__Epsilonproteobacteria;__Campylobacterales;Other;Other	0	0	3.51309e-05
Bacteria;__Proteobacteria;__Epsilonproteobacteria;__Campylobacterales;__Campylobacteraceae;Other	0	0	0
Bacteria;__Proteobacteria;__Epsilonproteobacteria;__Campylobacterales;__Campylobacteraceae;__Campylobacter	0	0	3.51309e-05
Bacteria;__Proteobacteria;__Epsilonproteobacteria;__Campylobacterales;__Campylobacteraceae;__Sulfurospirillum	0	0	0
Bacteria;__Proteobacteria;__Epsilonproteobacteria;__Campylobacterales;__Helicobacteraceae;Other	0	0	0
Bacteria;__Proteobacteria;__Gammaproteobacteria;__Alteromonadales;Other;Other	0	0	0
Bacteria;__Proteobacteria;__Gammaproteobacteria;__Alteromonadales;__Alteromonadaceae;__Glaciecola	0	0	0
Bacteria;__Proteobacteria;__Gammaproteobacteria;__Alteromonadales;__Alteromonadaceae;__Haliea	2.66937e-05	0	0.000105393
Bacteria;__Proteobacteria;__Gammaproteobacteria;__Alteromonadales;__Alteromonadaceae;__Halioglobus	2.66937e-05	0	0
Bacteria;__Proteobacteria;__Gammaproteobacteria;__Alteromonadales;__Alteromonadaceae;__Marinobacter	0	0	0
Bacteria;__Proteobacteria;__Gammaproteobacteria;__Alteromonadales;__Colwelliaceae;__Colwellia	0	0	0
Bacteria;__Proteobacteria;__Gammaproteobacteria;__Chromatiales;__Chromatiaceae;Other	0	0	0
Bacteria;__Proteobacteria;__Gammaproteobacteria;__Chromatiales;__Chromatiaceae;__Halochromatium	0	0	0
Bacteria;__Proteobacteria;__Gammaproteobacteria;__Chromatiales;__Chromatiaceae;__Rheinheimera	0	0	0
Bacteria;__Proteobacteria;__Gammaproteobacteria;__Enterobacteriales;__Enterobacteriaceae;__Candidatus_Ishikawaella	2.66937e-05	0	0
Bacteria;__Proteobacteria;__Gammaproteobacteria;__HOC36;__f;__g	0	0	0
Bacteria;__Proteobacteria;__Gammaproteobacteria;__KI89A_clade;__f;__g	2.66937e-05	0	7.02617e-05
Bacteria;__Proteobacteria;__Gammaproteobacteria;__Legionellales;__Coxiellaceae;__Rickettsiella	0	0	0
Bacteria;__Proteobacteria;__Gammaproteobacteria;__Oceanospirillales;Other;Other	0	3.4174e-05	7.02617e-05
Bacteria;__Proteobacteria;__Gammaproteobacteria;__Oceanospirillales;__Alcanivoracaceae;__Alcanivorax	2.66937e-05	0	0
Bacteria;__Proteobacteria;__Gammaproteobacteria;__Oceanospirillales;__Halomonadaceae;__Halomonas	0	0	0
Bacteria;__Proteobacteria;__Gammaproteobacteria;__Oceanospirillales;__MBAE14;__g	0	0	0
Bacteria;__Proteobacteria;__Gammaproteobacteria;__Oceanospirillales;__Oceanospirillaceae;Other	0	0	7.02617e-05
Bacteria;__Proteobacteria;__Gammaproteobacteria;__Oceanospirillales;__Oceanospirillaceae;__Amphritea	2.66937e-05	0	0
Bacteria;__Proteobacteria;__Gammaproteobacteria;__Oceanospirillales;__SS1-B-06-26;__g	0	0	0
Bacteria;__Proteobacteria;__Gammaproteobacteria;__Orbales;__Orbaceae;Other	0	0	0
Bacteria;__Proteobacteria;__Gammaproteobacteria;__Orbales;__Orbaceae;__Gilliamella	0	0	0
Bacteria;__Proteobacteria;__Gammaproteobacteria;__Order_Incertae_Sedis;__Family_Incertae_Sedis;Other	0	6.8348e-05	0
Bacteria;__Proteobacteria;__Gammaproteobacteria;__Order_Incertae_Sedis;__Family_Incertae_Sedis;__Arenicella	2.66937e-05	3.4174e-05	7.02617e-05
Bacteria;__Proteobacteria;__Gammaproteobacteria;__Order_Incertae_Sedis;__Family_Incertae_Sedis;__Thiohalophilus	0	0	0
Bacteria;__Proteobacteria;__Gammaproteobacteria;__Pasteurellales;__Pasteurellaceae;__Aggregatibacter	0	0	0
Bacteria;__Proteobacteria;__Gammaproteobacteria;__Pasteurellales;__Pasteurellaceae;__Haemophilus	0	0	0
Bacteria;__Proteobacteria;__Gammaproteobacteria;__Pseudomonadales;__Moraxellaceae;__Enhydrobacter	0	0	0
Bacteria;__Proteobacteria;__Gammaproteobacteria;__Thiotrichales;__Piscirickettsiaceae;__endosymbionts	8.00811e-05	0.00017087	0.000105393
Bacteria;__Proteobacteria;__Gammaproteobacteria;__Thiotrichales;__Piscirickettsiaceae;__uncultured	0	0	0
Bacteria;__Proteobacteria;__Gammaproteobacteria;__Thiotrichales;__Thiotrichaceae;Other	5.33874e-05	0	0
Bacteria;__Proteobacteria;__Gammaproteobacteria;__Vibrionales;__Vibrionaceae;__Photobacterium	0	0	0
Bacteria;__Proteobacteria;__Gammaproteobacteria;__Xanthomonadales;Other;Other	2.66937e-05	0	0.000140523
Bacteria;__Proteobacteria;__Gammaproteobacteria;__Xanthomonadales;__uncultured;__g	0	0	0
Bacteria;__Proteobacteria;__TA18;__o;__f;__g	0	0	3.51309e-05
Bacteria;__Proteobacteria;__Zetaproteobacteria;__Mariprofundales;__Mariprofundaceae;__Mariprofundus	2.66937e-05	0	0
Bacteria;__Proteobacteria;__pItb-vmat-80;__o;__f;__g	0	0	0
Bacteria;__Spirochaetae;__Spirochaetes;__Spirochaetales;__Brevinemataceae;__Brevinema	5.33874e-05	3.4174e-05	0
Bacteria;__Spirochaetae;__Spirochaetes;__Spirochaetales;__Leptospiraceae;Other	0	0	0
Bacteria;__Spirochaetae;__Spirochaetes;__Spirochaetales;__Leptospiraceae;__Rs-H88_termite_group	0	0	0
Bacteria;__Synergistetes;__Synergistia;__Synergistales;__Synergistaceae;__Dethiosulfovibrio	0	0	0
Bacteria;__Tenericutes;__Mollicutes;__Entomoplasmatales;__Spiroplasmataceae;__Spiroplasma	0	3.4174e-05	0
Bacteria;__Tenericutes;__Mollicutes;__Mycoplasmatales;__Mycoplasmataceae;__Mycoplasma	0	0	3.51309e-05
Bacteria;__Verrucomicrobia;__Opitutae;Other;Other;Other	0	0	0
Bacteria;__Verrucomicrobia;__Opitutae;__Opitutales;__Opitutaceae;__Alterococcus	2.66937e-05	0	3.51309e-05
Bacteria;__Verrucomicrobia;__Opitutae;__Puniceicoccales;__Puniceicoccaceae;Other	0	0	3.51309e-05
Bacteria;__Verrucomicrobia;__Opitutae;__Puniceicoccales;__Puniceicoccaceae;__Cerasicoccus	0	0	0
Bacteria;__Verrucomicrobia;__Opitutae;__Puniceicoccales;__Puniceicoccaceae;__uncultured	2.66937e-05	0.000102522	7.02617e-05
Bacteria;__Verrucomicrobia;__Spartobacteria;__Chthoniobacterales;__DA101_soil_group;__g	0	3.4174e-05	0
Bacteria;__Verrucomicrobia;__Verrucomicrobiae;__Verrucomicrobiales;__Verrucomicrobiaceae;Other	0	0	0
Bacteria;__WCHB1-60;__c;__o;__f;__g	0	0	0
